# Supplementary material
Source: Springer Nature journal article supplement (https://www.springermedizin.de/resource/supplementary/12943_2011_942_MOESM8_ESM.pdf/9551736)

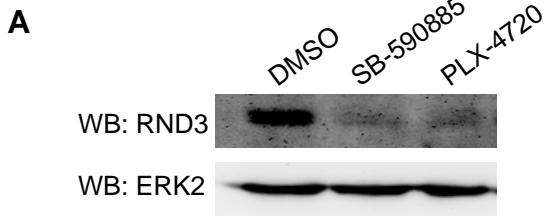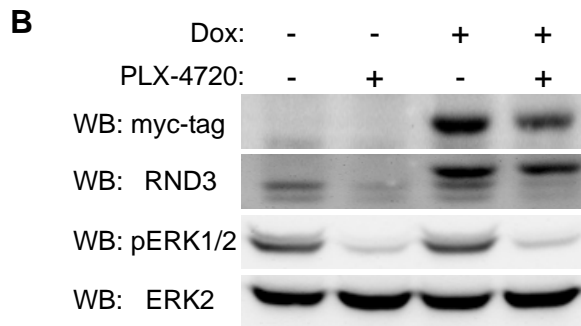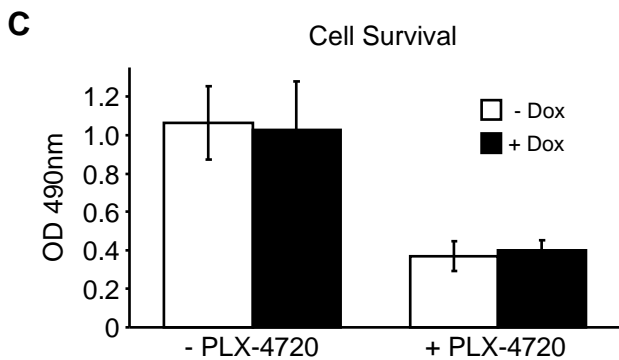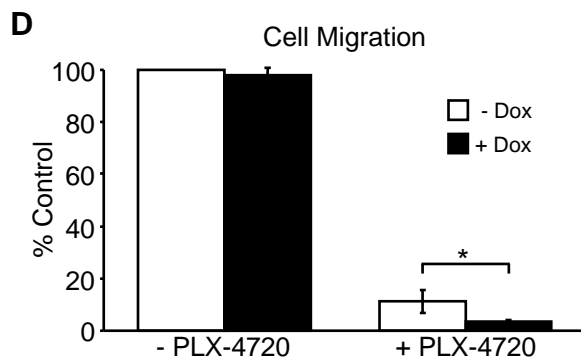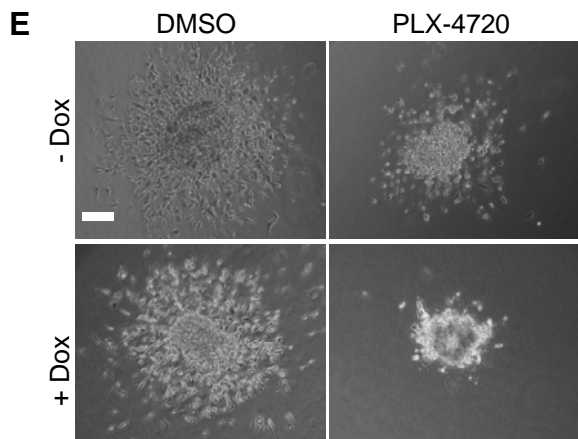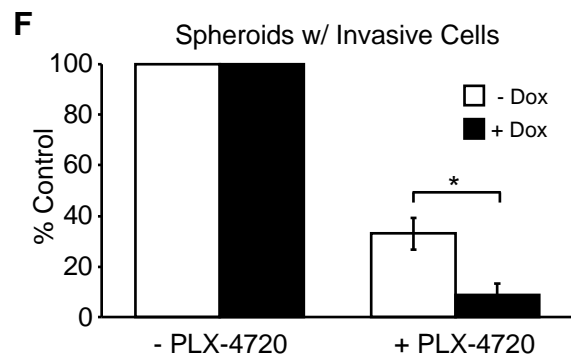

Supplement: MOESM8 [file 9551736]
